# Supplementary material
Source: PubMed Central journal article supplement (PMC5710640)
Supplement: jamapsychiatry-74-824-s001.pdf [file jamapsychiatry-74-824-s001.pdf]

## Supplementary Online Content

Whittle S, Vijayakumar N, Simmons JG, et al. Role of positive parenting in the association between neighborhood social disadvantage and brain development across adolescence. *JAMA Psychiatry*. Published online June 21, 2017. doi:10.1001/jamapsychiatry.2017.1558

**eAppendix.** Summary of literature on the effect of socioeconomic disadvantage on structural brain development across adolescence

**eMethods 1.** Measures of socioeconomic disadvantage

**eMethods 2.** Family interaction assessment and measures

**eMethods 3.** MRI acquisition and analysis and interscanner reliability

**eMethods 4.** Children's Global Assessment Scale

**eMethods 5.** Statistical analysis

**eTable 1.** Index of Relative Socioeconomic Disadvantage (IRSD) variable loadings, weights, and descriptions (SEIFA 2006)

**eTable 2.** Pearson bivariate correlations between variables

**eTable 3.** Clusters where cortical thickness and its development was significantly associated with neighborhood disadvantage (random field theory cluster corrected,  $P < .013$ )

**eTable 4.** Linear mixed effects models where there were significant effects of disadvantage (main or in interaction with age, sex, and/or maternal positive behavior)

**eFigure 1.** Histogram of Index of Relative Socioeconomic Disadvantage (IRSD) scores in the sample (higher scores indicate greater disadvantage)

**eFigure 2.** Proportion of participants for whom ROI thickness increased (light gray), decreased (dark gray), or did not change (mid gray), based on interscanner reliability analysis

**eFigure 3.** Neighborhood disadvantage associated with increased right middle temporal lobe thickness across age

**eFigure 4.** Individual developmental trajectories of the right amygdala, parahippocampal, and inferior temporal in adolescents with relatively high and low neighborhood disadvantage

**eFigure 5.** Individual development trajectories of regions associated with an interaction between positive maternal behavior and different measures of socioeconomic disadvantage

**eFigure 6.** Sex differences in the moderating effect of positive maternal behavior (during the event-planning interaction) on the association between neighborhood disadvantage and development of cortical thickness

**eReferences**

This supplementary material has been provided by the authors to give readers additional information about their work.

**eAppendix.** Summary of literature on the effect of socioeconomic disadvantage on structural brain development across adolescence

Few studies to date have investigated the associations between indicators of socioeconomic disadvantage and brain structural *development*. Regarding volume development, Hanson et al.<sup>1</sup> found that low parental income predicted reduced growth trajectories for total, frontal and parietal gray matter volumes from infancy to mid-childhood. Hair et al.<sup>2</sup>, in children and adolescents aged 4 to 22, found that low parental income was associated with a maturational lag in the volumetric development of the frontal and temporal lobes and hippocampus. Although not using longitudinal methodology, Noble et al.<sup>3</sup>, in a cross-sectional sample of children and adolescents aged 5 to 17, found increasing parental education-related differences with age in superior temporal and inferior frontal gyri volume. In the only study to investigate associations between SES and cortical thickness development, Piccolo et al.<sup>4</sup> found that higher SES (parental income and education) was linked with steeper age-related decreases in temporal cortical thickness in adolescence.<sup>4</sup>

## **eMethods 1. Measures of socioeconomic disadvantage**

### **Australian National University Four (ANU<sub>4</sub>) Scale of Occupations**

Of note, the measure of occupation status used in the current study was based on optimal scaling procedures, whereby scores were assigned to occupations in such a way as to maximize the role of occupation as an intervening variable between education and income (rather than using prestige as the criterion for weighting education and income). This approach remains the state-of-the-art approach for the continuous scaling of occupations and has also been used to generate national socioeconomic indices in countries such as New Zealand<sup>5</sup>.

### **Income-to-needs**

Income-to-needs ratio was measured based on reported family income relative to the relevant Australian poverty line for household size. Income was assessed for parents individually via interview. Income brackets (per annum, AUD: nil, \$1-7,799, \$7,800-12,999, \$13,000-20,799, \$20,800-31,199, \$31,200-41,599, \$41,600-51,999, \$52,000-67,599, \$67,600-83,199, \$83,200-103,999, \$104,000+), rather than exact amounts, were assessed due to sensitivities around inquiring about exact figures. The mid-point of income brackets < \$104,000, and a Pareto estimate<sup>6</sup> for the “\$104,000+” bracket, was used to calculate family income. For 38 families, where two parents were living in the home, income was only obtained from one parent. For these families, income of the missing parent was deduced from occupation based on national median salary scales. The income-to-needs ratio was not calculated for single parent families where parent income was not reported, and for two parent families where income was not reported by at least one parent and/or occupation for the other parent was not reported. Poverty lines were based upon the Melbourne Institute Labour Economics and Social Policy quarterly publication, “Poverty Lines: Australia” (<https://melbourneinstitute.com/miaesr/publications/indicators/poverty-lines-australia.html>), for the December 2011 quarter. This is a standard reference material for social welfare policy in Australia. Minimum income levels required to avoid a situation of poverty are presented for a range of family sizes and circumstances. The income-to-needs ratio was calculated as *parental income/poverty line (derived for single or couple, + number of children)*.

### **Socio-Economic Indexes For Areas (SEIFA) Index of Relative Socio-economic Disadvantage (IRSD)**

The SEIFA-IRSD<sup>7</sup> is a summary measure of a group of characteristics related to relative socioeconomic disadvantage in a given geographical area based upon household’s responses to a compulsory national population and household census conducted every five years by the Australian Bureau of Statistics (ABS). In SEIFA, principal components analysis is used to create a summary measure of a group of characteristics for each index. The IRSD item descriptions, variable loadings and weights are provided in eTable 1. The IRSD scores used here were based on the 2006 census, as is the most proximal to the maternal parenting assessment. The smallest area for which SEIFA data is available from the 2006 census is the Census Collection District (CD), which is equivalent to a group of suburban blocks, roughly 250 households in an urban area. Participant’s residential addresses at the Time 1 assessment were geocoded (i.e., longitude and latitude) and matched to the 2006 CD areas using a cloud-deployed commercial geomapping service (Callpoint Spatial Pty Ltd).

The IRSD scores for each CD were then extracted from ABS data, which are publically available online. Four participant addresses were unable to be geocoded to the specific address provided, as no corresponding physical address was on record: two addresses were unable to be matched at the street level, and post code level average IRSD was used in these cases; and, two addresses could not be matched at the street number level, and street level IRSD was used in these cases.

Note that area based measures are useful for the investigation of contextual effects of the socioeconomic environment. There is a wealth of empirical evidence that the social environment, including neighborhood characteristics, has a strong influence on child development, independent of the individual family situation (for a review see Sellström and Bremberg<sup>8</sup>). Further, while research has shown that family measures such as income-to-needs may be more predictive than neighborhood disadvantage for some child outcomes, for others, these measures may have equal (but unique) effects. It has been shown that there are contextual effects of area of residence on achievement for example, that are not captured by family-level measures.<sup>9</sup>

## **eMethods 2. Family interaction assessment and measures**

### **Family interaction assessment and measures**

Adolescents and mothers completed the lab-based interaction assessment at T1. Mother-adolescent dyads completed two 20-min interaction tasks that were video recorded for subsequent coding. An event-planning interaction (EPI) was completed first, followed by a problem-solving interaction (PSI). The EPI and PSI tasks were intended to differentially elicit positive and negative behavior, respectively. For the EPI, mothers and adolescents were instructed to plan one or more pleasant activities to do together, with up to five activities chosen on the basis of items that both the mother and adolescent rated as being “very pleasant” on the Pleasant Events Schedule.<sup>11</sup> For the PSI, mother-adolescent dyads were instructed to try to resolve one or more issues of disagreement, with up to five issues selected that the mother and adolescent endorsed as occurring the most frequently and generating the highest intensity of anger on the Issues Checklist.<sup>12</sup>

### **Living in Family Environments (LIFE) coding system**

The LIFE<sup>13</sup> is an observational, microsocial coding system that allows for a detailed analysis of individual family members’ behaviors. The LIFE system consists of 10 nonverbal affect codes (e.g., anger, dysphoria, happy) and 27 verbal content codes (e.g., validation, complaint, provoke). To code the video-recorded interactions, we used an event-based protocol in which new codes were entered each time the affect or content of one of the interactants changed. The affect and content codes were used to develop a composite positive interpersonal behavior construct (for the EPI and PSI separately). The positive construct included all behaviors with happy or caring affect as well as approving, validating, affectionate, or humorous comments made with neutral affect. We used the LIFE data to construct a frequency variable to measure maternal expression of positive emotion. These variables indicate the average number of times a mother expressed positive behavior per minute and were calculated separately for the EPI and PSI. Coders were extensively trained and blind to the clinical and demographic characteristics of the participants. Approximately 20% of the interactions were coded by a second observer to provide an estimate of observer agreement. The Kappa reliability coefficient for the positive construct was 0.86.

### **Validity of family interaction assessment and measures**

Observational research is suggested to be the gold standard by which parents’ responses to their children’s emotions can be measured<sup>14,15</sup>, offering several advantages over self-report measures. First, behavioral observations provide a more objective and relatively ‘natural’ assessment of behavior<sup>16</sup>. Second, observational methods may be less influenced by social desirability because participants have less control over the content of behavior that is observed in such paradigms<sup>16</sup>. Third, observational methods enable the recording of behavior of which the participant may not be consciously aware or able to report on, such as non-verbal behavior<sup>16</sup>.

The validity of the specific observational setting and coding system used in this study has been demonstrated previously. For example, in other work with this and other samples, we have shown that the frequency of parental negative and positive behaviors are significantly associated with maternal expressed emotion<sup>17</sup>, maternal temperament<sup>18</sup>, and adolescent emotion regulation<sup>19</sup> and autonomic responses<sup>20</sup> as well as mental health outcomes, including depression and anxiety (e.g.<sup>21,22</sup>).

### **eMethods 3. MRI acquisition and analysis and interscanner reliability**

#### **MRI acquisition and analysis**

At T1, MRI scans were performed on a 3 Tesla GE Signa scanner at the Brain Research Institute, Austin and Repatriation Medical Centre, Melbourne, Australia, with the following parameters: repetition time = 36 msec; echo time = 9msec; flip angle = 35°, field of view = 20cm, 124 T1-weighted contiguous slices (voxel dimensions = 0.4883 x 0.4883 x 1.5mm). MRI scans at T2 and T3 were performed on a 3 Tesla Siemens MAGNETOM Trio scanner at the Royal Children's Hospital, Melbourne, Australia, with the following parameters: repetition time = 1900 msec; echo time = 2.24 msec; flip angle = 9°, field of view = 23cm; 176 T1-weighted contiguous slices (voxel dimensions = 0.9mm<sup>3</sup>).

Images were transferred to an SGI/Linux workstation for morphometric analysis. Cortical reconstruction was performed using the FreeSurfer image analysis suite (<http://surfer.nmr.mgh.harvard.edu/>). Cortical thickness values were automatically quantified within FreeSurfer on a vertex-by-vertex basis by computing the average shortest distance between the white matter boundary and the pial surface.<sup>23</sup> Surface boundaries were visually inspected by a trained rater and, if necessary, errors due to segmentation miss-classification were manually corrected and re-processed. Subcortical volumes were estimated using an automated subcortical segmentation procedure that involves the assignment of a neuroanatomical label to each voxel in a MRI volume using a probabilistic atlas and Bayesian classification rule for label assignment. Subcortical segmentation output was visually inspected for accuracy by an individual trained in neuroanatomy. In order to address issues arising from longitudinal and/or multisite studies (such as geometric distortion and voxel dimension drift), images were processed through the longitudinal stream of FreeSurfer version 5.3,<sup>24</sup> which creates a within-unbiased subject template space and average image from both time points using robust, inverse consistent registration.<sup>25</sup> The template is used as an estimate to initialize subsequent segmentation processes in the longitudinal stream for each time point, providing common information regarding anatomical structures. This process significantly improves the repeatability and power of cortical measurements, having superior robustness with respect to noise, intensity scaling and outliers when compared to alternate registration tools.<sup>26</sup> All FreeSurfer image processing was conducted on a high performance computing facility at the Melbourne Neuropsychiatry Centre, Melbourne, Australia.

#### **Interscanner reliability**

Given that different scanners were used at the first vs the second and third MRI assessment, a reliability analysis was undertaken to address concerns that changes in cortical thickness over time may be due to measurement bias from the different scanner platforms and acquisition parameters. Four individuals (not part of the ADS sample), aged 23, 28, 35 and 36 were each scanned at BRI (locale of first MRI) and RCH (locale of second and third MRI) within a two-week period. The same acquisition parameters were used at each location to those described above, as well as the same semi-automated methods of data processing. Data from the inter-scanner reliability analysis was applied to the ADS sample using the descriptive procedure proposed by Lebel and Beaulieu<sup>27</sup>, in order to determine if the mean amount of change experienced by the study sample was likely to have occurred over and above

that expected from scanner effects. We calculated standard deviations for four ROIs (Desikan atlas labels based on regions plotted in Figures 1 and 4: right parahippocampal gyrus, right inferior temporal gyrus, right caudal middle frontal gyrus, right lateral orbitofrontal cortex) within each reliability subject based on their scores from the different scanners. A group average standard deviation was then calculated for each ROI (mean SD across all subjects). These values provide estimates of the measurement variability in each ROI that can be expected from scanner differences alone. The average SD data was applied to the ADS sample in order to determine the proportion (i.e., percentage) of subjects that experienced greater change (either increases or decreases) than the average SD. For each subject, change for each ROI was calculated using a difference score (i.e., cortical thickness for time 2 – time 1). Those with difference scores within 1 SD (determined from the reliability study) were considered to not change, while those with difference scores greater than 1 SD were considered to experience true change (over and above scanner effects). When the majority of subjects (i.e., >50%) experienced longitudinal change over and above that expected from scanner effects, this is taken as evidence that changes in cortical metrics identified by the mixed models in our previously reported results (Nandi ref) was reliable. The results from the ADS sample are presented in eFigure 2, indicating that for each ROI the majority of individuals (>50%) experienced greater cortical change over time than could be attributed to inter-scanner variance alone based on the reliability estimates. Similar results for other cortical ROIs have been previously reported by Vijayakumar et al.<sup>28,29</sup>, and for subcortical volumes have been previously reported by Dennison et al.<sup>30</sup>

#### **eMethods 4. Children's Global Assessment Scale**

The Children's Global Assessment Scale (CGAS<sup>31</sup>) was administered via interview during late adolescence to assess current global functioning (see Supplementary Material for more detail). The CGAS results in a total score from one to 100, with higher scores indicating superior functioning across a range of domains (i.e., functioning at school, home and with peers, involvement in activities and hobbies, absence of behavioral disturbance and psychiatric symptoms).



## eMethods 5. Statistical analysis

Cortical thickness was modeled within each  $i^{\text{th}}$  subject at each  $j^{\text{th}}$  vertex using the following equations:

1. Effects of socioeconomic disadvantage on brain development (where SD = occupation or education or neighborhood disadvantage):  $Y = \text{Intercept} + d_{ij} + \beta_1 (\text{age}) + \beta_2 (\text{SD}) + \beta_4 (\text{age} * \text{SD}) + e_{ijk}$ .
2. Sex effects in model 1:  $Y = \text{Intercept} + d_{ij} + \beta_1 (\text{sex}) + \beta_2 (\text{age}) + \beta_3 (\text{SD}) + \beta_4 (\text{age} * \text{SD}) + \beta_5 (\text{age} * \text{sex}) + \beta_6 (\text{sex} * \text{SD}) + \beta_7 (\text{age} * \text{sex} * \text{SD}) + e_{ijk}$ .
3. Moderating effect of maternal behavior (MPI = EPI or PSI) in model 1:  $Y = \text{Intercept} + d_{ij} + \beta_1 (\text{age}) + \beta_2 (\text{SD}) + \beta_3 (\text{MPI}) + \beta_4 (\text{age} * \text{SD}) + \beta_5 (\text{age} * \text{MPI}) + \beta_6 (\text{MPI} * \text{SD}) + \beta_7 (\text{age} * \text{SD} * \text{MPI}) + e_{ijk}$ .
4. Moderating effect of sex in model 3:  $Y = \text{Intercept} + d_{ij} + \beta_1 (\text{age}) + \beta_2 (\text{SD}) + \beta_3 (\text{MPI}) + \beta_4 (\text{sex}) + \beta_5 (\text{age} * \text{SD}) + \beta_6 (\text{age} * \text{MPI}) + \beta_7 (\text{MPI} * \text{SD}) + \beta_8 (\text{age} * \text{sex}) + \beta_9 (\text{SD} * \text{sex}) + \beta_{10} (\text{MPI} * \text{sex}) + \beta_{11} (\text{age} * \text{SD} * \text{MPI}) + \beta_{12} (\text{age} * \text{SD} * \text{sex}) + \beta_{13} (\text{age} * \text{sex} * \text{MPI}) + \beta_{14} (\text{sex} * \text{SD} * \text{MPI}) + \beta_{15} (\text{age} * \text{SD} * \text{MPI} * \text{sex}) + e_{ijk}$ .

The  $d_{ij}$  term represents the random effect of the intercept within each vertex in each subject. The  $e_{ijk}$  represents the normally distributed residual error term. Age, sex, SD and MPI were fixed effects, with  $\beta$  representing the parameter estimates for each of the main effects and interactions. All models were run with mean-centered continuous variables. Similar models were run for individual subcortical volumes. We did not control for whole brain volume or thickness. There is no consensus regarding controlling for such measures in longitudinal studies due to multiple issues with this process. First, whole brain volume is driven by both thickness and surface area, with some research suggesting that it is largely driven by surface area<sup>32,33</sup>. Only minor change has been identified in cortical thickness with enlargements of brain size, consistent with theoretical models by Van Essen<sup>34</sup> and Rakic<sup>35</sup>. These findings and theories question the influence of increasing whole brain volume on cortical thickness. Another important issue for developmental neuroimaging is that global brain size continues to change during adolescence<sup>36</sup>, and differences in development rates across the brain could bias results when controlling for global size.

**eTable 1.** Index of Relative Socioeconomic Disadvantage (IRSD) variable loadings, weights, and descriptions (SEIFA 2006)

| Variable mnemonic | Variable loading | Variable weight | Variable description                                                                                                 |
|-------------------|------------------|-----------------|----------------------------------------------------------------------------------------------------------------------|
|                   |                  |                 |                                                                                                                      |
| NONET             | -0.85            | -0.33           | % Occupied private dwellings with no Internet connection                                                             |
| OCC_LABOUR        | -0.76            | -0.30           | % Employed people classified as Labourers                                                                            |
| NOQUAL            | -0.76            | -0.30           | % People aged 15 years and over with no post-school qualifications                                                   |
| INC_LOW           | -0.76            | -0.30           | % People with stated annual household equivalised income between \$13,000 and \$20,799 (approx. 2nd and 3rd deciles) |
| RENT_SOCIAL       | -0.70            | -0.27           | % Households renting from a Government or Community organisation                                                     |
| UNEMPLOYED        | -0.70            | -0.27           | % People (in the labour force) unemployed                                                                            |
| ONEPARENT         | -0.67            | -0.26           | % Families that are one parent families with dependent offspring only                                                |
| LOWRENT           | -0.67            | -0.26           | % Households paying rent who pay less than \$120 per week (excluding \$0 per week)                                   |
| DISABILITYU70     | -0.61            | -0.24           | % People aged under 70 who have a long-term health condition or disability and need assistance with core activities  |
| NOCAR             | -0.57            | -0.22           | % Occupied private dwellings with no car                                                                             |
| INDIGENOUS        | -0.52            | -0.20           | % People who identified themselves as being of Aboriginal and/or Torres Strait Islander origin                       |
| OVERCROWD         | -0.52            | -0.20           | % Occupied private dwellings requiring one or more extra bedrooms (based on Canadian National Occupancy Standard)    |
| DIVORCED          | -0.51            | -0.20           | % People aged 15 years and                                                                                           |

|               |       |       |                                                                                  |
|---------------|-------|-------|----------------------------------------------------------------------------------|
|               |       |       | over who are separated or divorced                                               |
| OCC_DRIVERS   | -0.51 | -0.20 | % Employed people classified as Machinery Operators and Drivers                  |
| NOSCHOOL      | -0.44 | -0.17 | % People aged 15 years and over who did not go to school                         |
| OCC_SERVICE_L | -0.44 | -0.17 | % Employed people classified as Low Skill Community and Personal Service Workers |
| ENGLISHPOOR   | -0.33 | -0.13 | % People who do not speak English well                                           |

**eTable 2.** Pearson bivariate correlations between variables

|                     | IRSD          | Parental Occupation | Parental Education | MPI PSI | MPI EPI      | FSIQ          | CGAS          | ATAR         | DNCYr12       |
|---------------------|---------------|---------------------|--------------------|---------|--------------|---------------|---------------|--------------|---------------|
| INR                 | <b>-0.293</b> | <b>0.325</b>        | <b>0.315</b>       | 0.068   | 0.146        | .186          | 0.185         | <b>0.352</b> | -0.157        |
| IRSD                |               | <b>-0.281</b>       | <b>-0.227</b>      | -0.035  | 0.054        | <b>-0.172</b> | <b>-0.277</b> | -0.172       | <b>0.233</b>  |
| Parental Occupation |               |                     | <b>0.623</b>       | 0.098   | -0.104       | 0.068         | <b>0.207</b>  | <b>0.365</b> | <b>-0.249</b> |
| Parental Education  |               |                     |                    | 0.094   | -0.017       | <b>0.356</b>  | 0.175         | <b>0.469</b> | -0.158        |
| MPI PSI             |               |                     |                    |         | <b>0.457</b> | <b>0.178</b>  | <b>0.269</b>  | 0.151        | <b>-0.200</b> |
| MPI EPI             |               |                     |                    |         |              | 0.036         | <b>0.209</b>  | -0.032       | <b>-0.183</b> |
| FSIQ                |               |                     |                    |         |              |               | 0.095         | <b>0.363</b> | <b>-0.185</b> |
| CGAS                |               |                     |                    |         |              |               |               | <b>0.230</b> | <b>-0.493</b> |
| ATAR                |               |                     |                    |         |              |               |               |              | -0.201        |

Bold indicates significant at  $p < 0.05$

FSIQ = estimated full-scale intelligence quotient, INR = income-to-needs ratio, IRSD = Index of Relative Socioeconomic Disadvantage (i.e., neighborhood disadvantage; higher score represents greater disadvantage), CGAS = child global assessment scale, DNCYr12 = did not complete year 12. Maternal positive interpersonal (MPI) behaviors were measures from both a problem solving interaction (PSI) and an event planning interaction (EPI).

**eTable 3.** Clusters where cortical thickness and its development was significantly associated with neighborhood disadvantage (random field theory cluster corrected,  $P < .013$ )

|                              | Region                                                          | Hemisphere | t     | Cluster size | x     | y     | z     |
|------------------------------|-----------------------------------------------------------------|------------|-------|--------------|-------|-------|-------|
| IRSD                         | Middle temporal cortex                                          | R          | 4.669 | 160          | 65.2  | -22.3 | -9.8  |
| -IRSD x age                  | Fusiform/Inferior/middle temporal cortex, parahippocamal cortex | R          | 5.879 | 3150         | 39.2  | -12.5 | -29.9 |
|                              | Inferior temporal cortex                                        | L          | 4.239 | 618          | -56.7 | -58.4 | -19.4 |
|                              | Middle temporal cortex                                          | R          | 4.283 | 272          | 51.8  | 3.2   | -25.1 |
|                              | Lateral occipital cortex                                        | L          | 3.896 | 169          | -41.8 | -62.7 | 19.8  |
|                              | Temporal pole                                                   | L          | 4.604 | 207          | -36.4 | 20.3  | -38.9 |
| IRSD x age x MPI (PSI) x sex | Superior frontal cortex                                         | R          | 4.601 | 340          | 9.5   | 22.8  | 62.8  |
|                              | Middle frontal cortex                                           | R          | 5.102 | 318          | 43.1  | 16.2  | 41.4  |
|                              | Lateral orbitofrontal cortex                                    | R          | 4.370 | 271          | 32.1  | 32.7  | -14.4 |
|                              | Middle frontal cortex                                           | L          | 4.917 | 196          | -29.3 | 9.6   | 57.7  |
|                              | Precentral cortex                                               | L          | 5.225 | 199          | -7.0  | -23.4 | 60.7  |
|                              | Supramarginal cortex                                            | L          | 4.559 | 143          | -44.3 | -40.8 | 41.7  |
|                              | Superior frontal cortex                                         | R          | 4.488 | 113          | 23.7  | 6.1   | 51.1  |
| IRSD x age x MPI (EPI) x sex | Superior frontal cortex                                         | R          | 5.300 | 213          | 23.2  | 26.6  | 54.7  |
|                              | Superior frontal cortex                                         | L          | 4.076 | 180          | -18.3 | 33.8  | 52.8  |
|                              | Posterior insula cortex                                         | R          | 4.833 | 192          | 41.3  | -13.2 | 11.0  |
|                              | Middle frontal cortex                                           | L          | 4.319 | 135          | -39.9 | 23.5  | 44.6  |

IRSD = Index of Relative Socio-economic Disadvantage, L = left, R = right, MPI = frequency of maternal positive interpersonal behaviour, EPI = event planning interaction, PSI = problem solving interaction.

**eTable 4.** Linear mixed effects models where there were significant effects of disadvantage (main or in interaction with age, sex, and/or maternal positive behavior)

| Neighborhood Disadvantage          | Intercept  |            |     |            |         | Age        |            |     |            |        | IRSD       |            |     |            |            | Age*IRSD   |            |     |            |            |
|------------------------------------|------------|------------|-----|------------|---------|------------|------------|-----|------------|--------|------------|------------|-----|------------|------------|------------|------------|-----|------------|------------|
|                                    | B          | SE         | DF  | T          | p       | B          | SE         | DF  | T          | p      | B          | SE         | DF  | T          | p          | B          | SE         | DF  | T          | p          |
| Left Amygdala                      | 1427.85491 | 29.8359839 | 198 | 47.8568064 | 0.00000 | 13.3139295 | 1.59891459 | 198 | 8.32685472 | 0.0000 | 4.34622442 | 1.12583125 | 164 | 3.86045814 | 0.00016252 | -0.2331414 | 0.06158061 | 198 | -3.7859541 | 0.00020294 |
| Right Amygdala                     | 1514.3507  | 35.9296852 | 198 | 42.1476194 | 0.00000 | 12.2487308 | 2.03107225 | 198 | 6.03067212 | 0.0000 | 3.72559905 | 1.3568116  | 164 | 2.74584847 | 0.00670945 | -0.2085177 | 0.07823552 | 198 | -2.6652563 | 0.00832784 |
| Right Inferior Temporal Gyrus      | 2.13810652 | 0.07686934 | 198 | 27.8148168 | 0.00000 | 0.05438741 | 0.0045824  | 198 | 11.8687631 | 0.0000 | 0.01968652 | 0.00290748 | 164 | 6.77098298 | 0.00000000 | -0.0011031 | 0.00017661 | 198 | -6.246257  | 0.00000000 |
| Right Parahippocampal Gyrus        | 3.01560623 | 0.05887111 | 198 | 51.2238697 | 0.00000 | 0.00726001 | 0.00349133 | 198 | 2.07943763 | 0.0389 | 0.01120085 | 0.00222614 | 164 | 5.03151867 | 0.00000127 | -0.0006585 | 0.00013454 | 198 | -4.8941225 | 0.00000204 |
| Right Amygdala                     | Intercept  |            |     |            |         | Age        |            |     |            |        | IRSD       |            |     |            |            | Sex        |            |     |            |            |
|                                    | B          | SE         | DF  | T          | p       | B          | SE         | DF  | T          | p      | B          | SE         | DF  | T          | p          | B          | SE         | DF  | T          | p          |
|                                    | 1537.3751  | 49.4611321 | 196 | 31.0824891 | 0.00000 | 15.7233963 | 2.84963178 | 196 | 5.51769403 | 0.0000 | 8.18190903 | 1.91694634 | 162 | 4.2681993  | 0.00003340 | -52.670939 | 69.8566406 | 162 | -0.7539861 | 0.45195207 |
| Right Dorsal Frontal Cortex        | Intercept  |            |     |            |         | Age        |            |     |            |        | IRSD       |            |     |            |            | MPI_PSI    |            |     |            |            |
|                                    | B          | SE         | DF  | T          | p       | B          | SE         | DF  | T          | p      | B          | SE         | DF  | T          | p          | B          | SE         | DF  | T          | p          |
|                                    | 3.61126833 | 0.08443896 | 192 | 42.7677974 | 0.00000 | -0.012567  | 0.0050143  | 192 | -2.5062282 | 0.0130 | 0.00689485 | 0.00332633 | 158 | 2.07280591 | 0.03981431 | -0.0731975 | 0.15701456 | 158 | -0.4661829 | 0.64172664 |
| Right Lateral Orbitofrontal Cortex | 3.2758925  | 0.08111214 | 192 | 40.3872051 | 0.00000 | -0.0051089 | 0.00484117 | 192 | -1.055305  | 0.2926 | 0.00865376 | 0.00319527 | 158 | 2.70830275 | 0.00750822 | 0.25037335 | 0.15084387 | 158 | 1.65981783 | 0.09893458 |
| Occupation                         | Intercept  |            |     |            |         | Age        |            |     |            |        | Occupation |            |     |            |            | MPI_PSI    |            |     |            |            |
|                                    | B          | SE         | DF  | T          | p       | B          | SE         | DF  | T          | p      | B          | SE         | DF  | T          | p          | B          | SE         | DF  | T          | p          |
| Left Amygdala                      | 1419.77245 | 30.1589413 | 196 | 47.0763358 | 0.00000 | 13.589621  | 1.62851186 | 196 | 8.34480935 | 0.0000 | 0.37249475 | 1.52513697 | 162 | 0.24423691 | 0.80735639 | 57.1483222 | 50.1243922 | 162 | 1.14012998 | 0.25591499 |
| Income-to-needs                    | Intercept  |            |     |            |         | Age        |            |     |            |        | INR        |            |     |            |            | MPI_PSI    |            |     |            |            |
|                                    | B          | SE         | DF  | T          | p       | B          | SE         | DF  | T          | p      | B          | SE         | DF  | T          | p          | B          | SE         | DF  | T          | p          |
| Right Amygdala                     | 1781.0879  | 20.96003   | 188 | 84.97545   | 0.00000 | 13.2384    | 2.87744    | 188 | 4.60075    | 0.0000 | 23.484     | 13.00554   | 188 | 1.80569    | 0.0726     | 102.7108   | 35.65656   | 162 | 2.88056    | 0.0045     |

Neighborhood Disadvantage

Left Amygdala  
 Right Amygdala  
 Right Inferior Temporal Gyrus  
 Right Parahippocampal Gyrus

|                                    | Age*IRSD       |            |     |            |            | Age*Sex     |            |     |            |            | IRSD*sex           |            |     |            |            | AGE*IRSD*sex           |            |     |            |            |
|------------------------------------|----------------|------------|-----|------------|------------|-------------|------------|-----|------------|------------|--------------------|------------|-----|------------|------------|------------------------|------------|-----|------------|------------|
|                                    | B              | SE         | DF  | T          | p          | B           | SE         | DF  | T          | p          | B                  | SE         | DF  | T          | p          | B                      | SE         | DF  | T          | p          |
| Right Amygdala                     | -0.456335      | 0.11444446 | 196 | -3.9873927 | 0.000094   | -6.4630229  | 3.9899192  | 196 | -1.619838  | 0.1068749  | -8.0698702         | 2.64539684 | 162 | -3.0505329 | 0.00266963 | 0.45037269             | 0.15450705 | 196 | 2.91490053 | 0.00397212 |
|                                    | Sex            |            |     |            |            | Age*IRSD    |            |     |            |            | Age*MPI_PSI        |            |     |            |            | IRSD*MPI_PSI           |            |     |            |            |
|                                    | B              | SE         | DF  | T          | p          | B           | SE         | DF  | T          | p          | B                  | SE         | DF  | T          | p          | B                      | SE         | DF  | T          | p          |
| Right Dorsal Frontal Cortex        | 0.08329453     | 0.11978406 | 158 | 0.69537241 | 0.48784341 | -0.0003634  | 0.00020688 | 192 | -1.7563957 | 0.08061515 | -0.0032138         | 0.00930313 | 192 | -0.3454519 | 0.73013286 | -0.0201454             | 0.0065251  | 158 | -3.0873749 | 0.0023856  |
| Right Lateral Orbitofrontal Cortex | 0.15766786     | 0.11510816 | 158 | 1.36973659 | 0.17271263 | -0.0006484  | 0.00019957 | 192 | -3.2487309 | 0.00136849 | -0.0146402         | 0.00897621 | 192 | -1.6309951 | 0.1045306  | -0.0239354             | 0.00626534 | 158 | -3.820284  | 0.00019121 |
| Occupation                         | Age*Occupation |            |     |            |            | Age*MPI_PSI |            |     |            |            | Occupation*MPI_PSI |            |     |            |            | AGE*Occupation*MPI_PSI |            |     |            |            |
|                                    | B              | SE         | DF  | T          | p          | B           | SE         | DF  | T          | p          | B                  | SE         | DF  | T          | p          | B                      | SE         | DF  | T          | p          |
| Left Amygdala                      | -0.0913941     | 0.08154607 | 196 | -1.1207669 | 0.26375844 | 0.35875073  | 2.73146204 | 196 | 0.13134019 | 0.89564092 | -5.9784911         | 2.50474561 | 162 | -2.3868656 | 0.01814564 | 0.38201269             | 0.13185445 | 196 | 2.8972302  | 0.00419295 |
| Income-to-needs                    | Sex            |            |     |            |            | Age*INR     |            |     |            |            | Age*MPI_PSI        |            |     |            |            | INR*MPI_PSI            |            |     |            |            |
|                                    | B              | SE         | DF  | T          | p          | B           | SE         | DF  | T          | p          | B                  | SE         | DF  | T          | p          | B                      | SE         | DF  | T          | p          |
| Right Amygdala                     | -146.695       | 29.77041   | 162 | -4.92754   | 0.0000     | -10.0582    | 3.95177    | 188 | -2.54524   | 0.0117     | 8.6202             | 5.42207    | 188 | 1.58983    | 0.1136     | -37.6313               | 24.00658   | 188 | -1.56764   | 0.1187     |

Neighborhood Disadvantage

Left Amygdala  
 Right Amygdala  
 Right Inferior Temporal Gyrus  
 Right Parahippocampal Gyrus

|                                    | Age*Sex    |            |     |            |            | IRSD*Sex   |            |     |            |            | MPI_PSI*sex |            |     |            |            | Age*IRSD*MPI_PSI |            |     |            |            |
|------------------------------------|------------|------------|-----|------------|------------|------------|------------|-----|------------|------------|-------------|------------|-----|------------|------------|------------------|------------|-----|------------|------------|
|                                    | B          | SE         | DF  | T          | p          | B          | SE         | DF  | T          | p          | B           | SE         | DF  | T          | p          | B                | SE         | DF  | T          | p          |
| Right Dorsal Frontal Cortex        | -0.0025252 | 0.00703703 | 192 | -0.3588415 | 0.72010798 | 0.00123739 | 0.0045583  | 158 | 0.27145924 | 0.7863922  | 0.06961706  | 0.20533288 | 158 | 0.33904489 | 0.73502611 | 0.00119467       | 0.00041549 | 192 | 2.87534982 | 0.00449147 |
| Right Lateral Orbitofrontal Cortex | -0.0136415 | 0.00679799 | 192 | -2.0066942 | 0.04618515 | -0.007309  | 0.00438133 | 158 | -1.6682241 | 0.09725182 | 0.03619767  | 0.1972717  | 158 | 0.18349143 | 0.85464771 | 0.00168945       | 0.00040019 | 192 | 4.22163544 | 0.0000374  |
| Occupation                         | Sex*Age    |            |     |            |            | Sex*INR    |            |     |            |            | Sex*MPI_PSI |            |     |            |            | INR*Age*MPI_PSI  |            |     |            |            |
|                                    | B          | SE         | DF  | T          | p          | B          | SE         | DF  | T          | p          | B           | SE         | DF  | T          | p          | B                | SE         | DF  | T          | p          |
| Right Amygdala                     | -4.4462    | 3.99823    | 188 | -1.11205   | 0.2675     | -29.604    | 16.91385   | 188 | -1.75028   | 0.0817     | -104.6021   | 49.73246   | 162 | -2.10333   | 0.037      | -21.5539         | 7.94071    | 188 | -2.71435   | 0.0073     |

Neighborhood Disadvantage

Left Amygdala  
 Right Amygdala  
 Right Inferior Temporal Gyrus  
 Right Parahippocampal Gyrus

Right Amygdala

|                                 | Age*IRSD*Sex |            |     |            |            | Age*MPI_PSI*Sex |            |     |            |            | IRSD*MPI_PSI*Sex |            |     |            |          | Age*IRSD*MPI_PSI*Sex |            |     |            |          |
|---------------------------------|--------------|------------|-----|------------|------------|-----------------|------------|-----|------------|------------|------------------|------------|-----|------------|----------|----------------------|------------|-----|------------|----------|
|                                 | B            | SE         | DF  | T          | p          | B               | SE         | DF  | T          | p          | B                | SE         | DF  | T          | p        | B                    | SE         | DF  | T          | p        |
| Right Dorsal Frontal Cortex     | -0.0001601   | 0.0002763  | 192 | -0.579261  | 0.56309211 | 0.00328724      | 0.01211812 | 192 | 0.27126649 | 0.7864775  | 0.04144263       | 0.00852161 | 158 | 4.86323835 | 0.000003 | -0.0024347           | 0.00052495 | 192 | -4.6380269 | 0.000006 |
| Right Lateral Orbitofrontal Cor | 0.00060853   | 0.00026687 | 192 | 2.28022139 | 0.02369334 | 0.00135134      | 0.01117014 | 192 | 0.11548549 | 0.90818101 | 0.03524897       | 0.00818515 | 158 | 4.30645528 | 0.000029 | -0.0021207           | 0.00050637 | 192 | -4.1879719 | 0.000043 |

Occupation

Left Amygdala

Income-to-needs

|                | Age*INR*Sex |         |     |         |        | Age*MPI_PSI*Sex |         |     |          |        | INR*MPI_PSI*Sex |          |     |         |          | Age*INR*MPI_PSI*Sex |         |     |        |          |
|----------------|-------------|---------|-----|---------|--------|-----------------|---------|-----|----------|--------|-----------------|----------|-----|---------|----------|---------------------|---------|-----|--------|----------|
|                | B           | SE      | DF  | T       | p      | B               | SE      | DF  | T        | p      | B               | SE       | DF  | T       | p        | B                   | SE      | DF  | T      | p        |
| Right Amygdala | 12.5916     | 4.93621 | 188 | 2.55087 | 0.0115 | -15.8054        | 6.98033 | 188 | -2.26427 | 0.0247 | 16.4654         | 31.37602 | 188 | 0.52478 | 0.600400 | 27.7406             | 9.54366 | 188 | 2.9067 | 0.004100 |



**eFigure 1.** Histogram of Index of Relative Socioeconomic Disadvantage (IRSD) scores in the sample (higher scores indicate greater disadvantage)

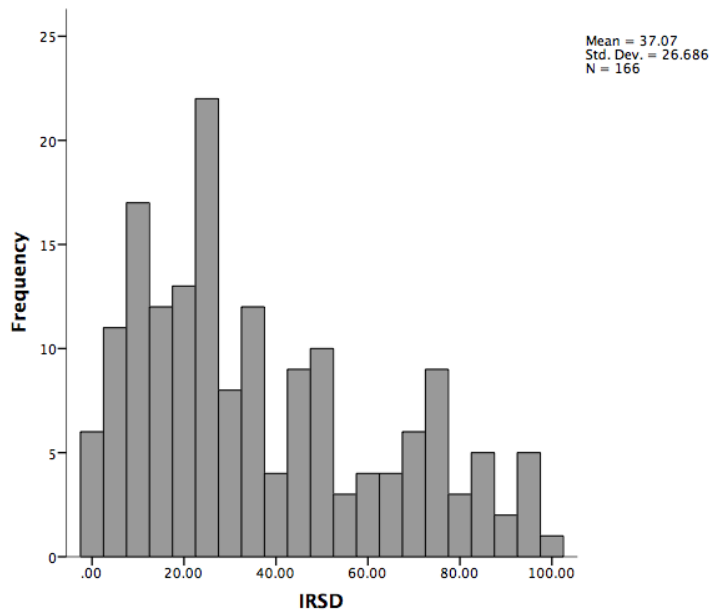

**eFigure 2.** Proportion of participants for whom ROI thickness increased (light gray), decreased (dark gray), or did not change (mid gray), based on interscanner reliability analysis<sup>28</sup>

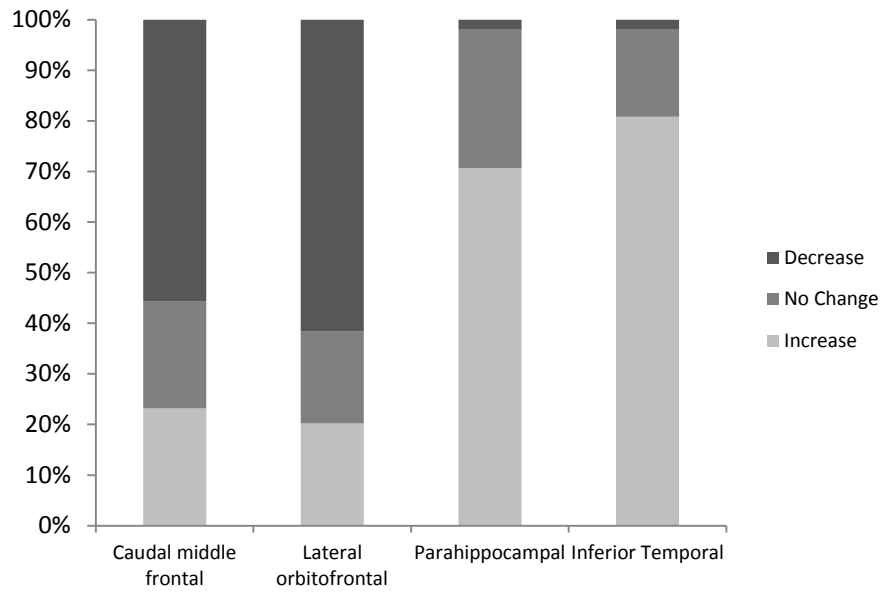

**eFigure 3.** Neighborhood disadvantage associated with increased right middle temporal lobe thickness across age

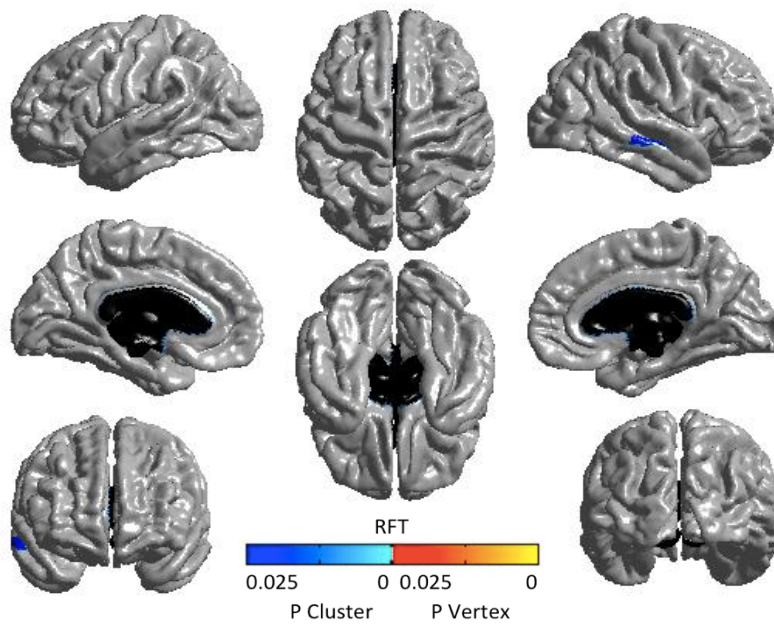

**eFigure 4.** Individual developmental trajectories of the right amygdala, parahippocampal, and inferior temporal in adolescents with relatively high and low neighborhood disadvantage

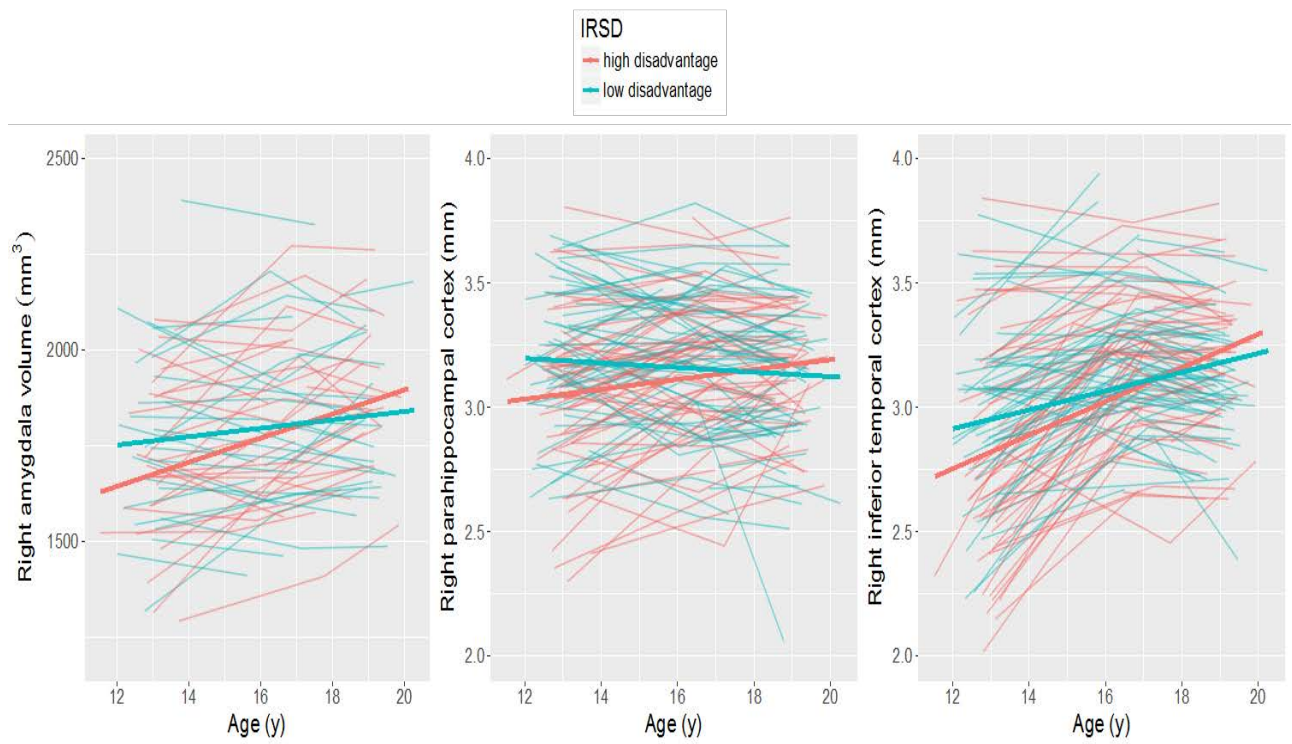

**eFigure 5.** Individual development trajectories of regions associated with an interaction between positive maternal behavior and different measures of socioeconomic disadvantage

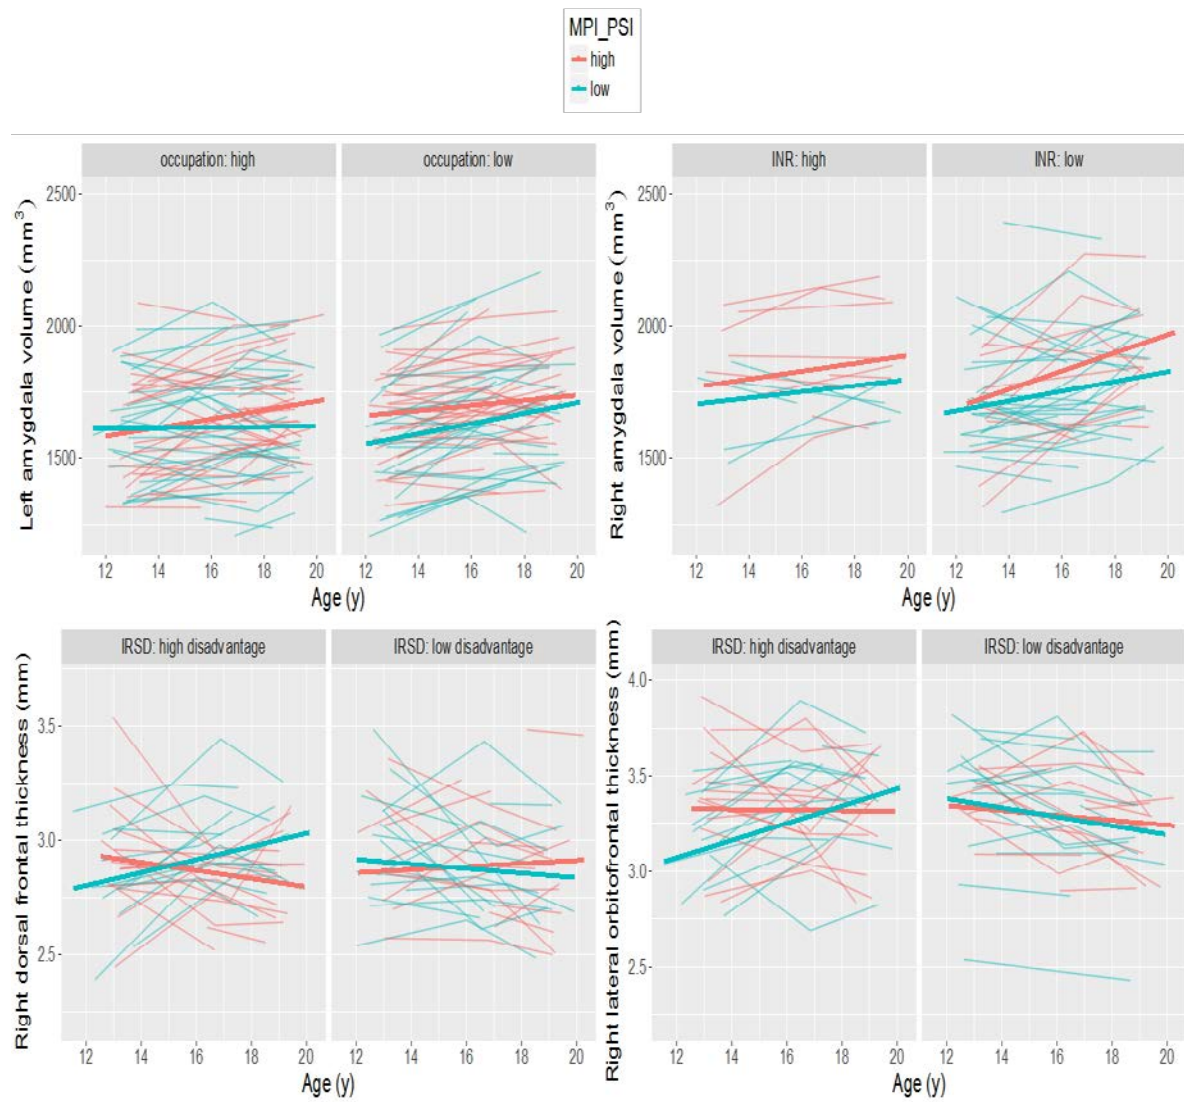

**eFigure 6.** Sex differences in the moderating effect of positive maternal behavior (during the event-planning interaction) on the association between neighborhood disadvantage and development of cortical thickness

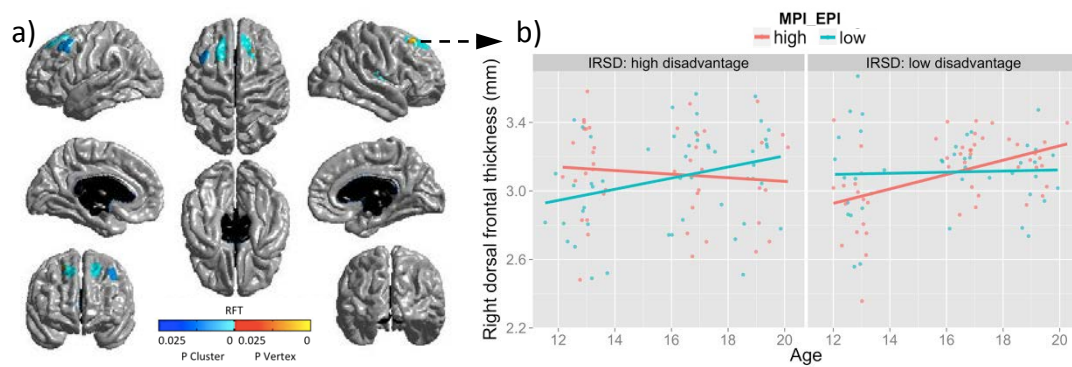

Note that slopes represent average brain development for low and high MPI groups based on a median split of the data. IRSD = Index of Relative Socio-economic Disadvantage, MPI\_EPI = maternal positive interpersonal behaviour during the event planning interaction.

## eReferences

1. Hanson JL, Hair N, Shen DG, et al. Family poverty affects the rate of human infant brain growth. *PloS one*. 2013;8(12):e80954.
2. Hair NL, Hanson JL, Wolfe BL, Pollak SD. Association of child poverty, brain development, and academic achievement. *JAMA pediatrics*. 2015;169(9):822-829.
3. Noble KG, Houston SM, Kan E, Sowell ER. Neural correlates of socioeconomic status in the developing human brain. *Developmental science*. 2012;15(4):516-527.
4. Piccolo LR, Merz EC, He X, Sowell ER, Noble KG. Age-Related Differences in Cortical Thickness Vary by Socioeconomic Status. *PloS one*. 2016;11(9):e0162511.
5. Davis P, Jenkin G, Coope P. *New Zealand Socioeconomic Index of Occupational Status 1996: An update and revision of the New Zealand Socioeconomic Index of Occupational Status, Research Report Number 20*. Wellington, New Zealand: Statistics New Zealand;2003.
6. Miller HP. “*Income Distribution in the United States*”, a 1960 census monograph. Washington: U.S. Bureau of the Census; 1966.
7. Pink B. Information paper: an introduction to socio-economic indexes for areas (SEIFA), 2006. *Canberra: Australian Bureau of Statistics (ABS)*. 2008.
8. Sellström E, Bremberg S. Review Article: The significance of neighbourhood context to child and adolescent health and well-being: A systematic review of multilevel studies. *Scandinavian Journal of Social Medicine*. 2006;34(5):544-554.
9. Marks GN. The Measurement of Socioeconomic Status and Social Class in the LSAY Project Technical Paper No. 14. *LSAY Technical Reports*. 1999.
10. Pink B. Technical Paper: Socio-Economic Indexes for Areas (SEIFA). 2011. *Australian Bureau of Statistics: Canberra Google Scholar*. 2011.
11. MacPhillamy DJ, Lewinsohn PM. *Manual for the pleasant events schedule*: DJ MacPhillamy & PM Lewinsohn; 1976.
12. Prinz RJ, Foster S, Kent RN, O’Leary KD. Multivariate assessment of conflict in distressed and nondistressed mother-adolescent dyads. *J. Appl. Behav. Anal*. 1979;12(4):691-700.
13. Hops H, Biglan A, Tolman A, Arthur J, Longoria N. Living in Family Environments (LIFE) coding system: Manual for coders (Revised). *Eugene, OR: Oregon Research Institute*. 1995.
14. Zeman J, Klimes-Dougan B, Cassano M, Adrian M. Measurement issues in emotion research with children and adolescents. *Clinical Psychology: Science and Practice*. 2007;14(4):377-401.
15. Zeman J, Klimes-Dougan B, Cassano M, Adrian M. Measurement issues in emotion research with children and adolescents. *Clinical Psychology: Science and Practice*. 2007;14(4):377-401.
16. Morris AS, Robinson LR, Eisenberg N. Applying a multimethod perspective to the study of developmental psychology. In: Eid M, Diener E, eds. *Handbook of Multimethod Measurement in Psychology*. Washington, D.C.: American Psychological Association; 2006:371-384.
17. Cruise RC, Sheeber LB, Tompson MC. Behavioral correlates of maternal expressed emotion in interaction tasks. *Journal of Family Psychology*. 2011;25(5):781.
18. Davenport E, Yap MB, Simmons JG, Sheeber LB, Allen NB. Maternal and adolescent temperament as predictors of maternal affective behavior during mother-adolescent interactions. *Journal of adolescence*. 2011;34(5):829-839.
19. Yap MB, Schwartz OS, Byrne ML, Simmons JG, Allen NB. Maternal positive and negative interaction behaviors and early adolescents' depressive symptoms:

- Adolescent emotion regulation as a mediator. *Journal of Research on Adolescence*. 2010;20(4):1014-1043.
20. Allen NB, Kuppens P, Sheeber LB. Heart rate responses to parental behavior in depressed adolescents. *Biological psychology*. 2012;90(1):80-87.
  21. Schwartz OS, Byrne ML, Simmons JG, et al. Parenting during early adolescence and adolescent-onset major depression: A 6-year prospective longitudinal study. *Clinical Psychological Science*. 2014;2(3):272-286.
  22. Sheeber LB, Davis B, Leve C, Hops H, Tildesley E. Adolescents' relationships with their mothers and fathers: associations with depressive disorder and subdiagnostic symptomatology. *Journal of abnormal psychology*. 2007;116(1):144.
  23. Fischl B, Dale AM. Measuring the thickness of the human cerebral cortex from magnetic resonance images. *Proceedings of the National Academy of Sciences*. 2000;97(20):11050-11055.
  24. Reuter M, Schmansky NJ, Rosas HD, Fischl B. Within-subject template estimation for unbiased longitudinal image analysis. *Neuroimage*. 2012;61(4):1402-1418.
  25. Reuter M, Fischl B. Avoiding asymmetry-induced bias in longitudinal image processing. *Neuroimage*. 2011;57(1):19-21.
  26. Reuter M, Rosas HD, Fischl B. Highly accurate inverse consistent registration: a robust approach. *Neuroimage*. 2010;53(4):1181-1196.
  27. Lebel C, Beaulieu C. Longitudinal development of human brain wiring continues from childhood into adulthood. *Journal of Neuroscience*. 2011;31(30):10937-10947.
  28. Vijayakumar N, Allen NB, Youssef G, et al. Brain development during adolescence: A mixed-longitudinal investigation of cortical thickness, surface area, and volume. *Human brain mapping*. 2016.
  29. Vijayakumar N, Whittle S, Yücel M, Dennison M, Simmons J, Allen NB. Prefrontal structural correlates of cognitive control during adolescent development: a 4-year longitudinal study. *Journal of cognitive neuroscience*. 2014;26(5):1118-1130.
  30. Dennison M, Whittle S, Yücel M, et al. Mapping subcortical brain maturation during adolescence: evidence of hemisphere- and sex-specific longitudinal changes. *Developmental science*. 2013;16(5):772-791.
  31. Shaffer D, Gould MS, Brasic J, et al. A children's global assessment scale (CGAS). *Archives of General Psychiatry*. 1983;40(11):1228-1231.
  32. Im K, Lee J-M, Lyttelton O, Kim SH, Evans AC, Kim SI. Brain size and cortical structure in the adult human brain. *Cerebral Cortex*. 2008;18(9):2181-2191.
  33. Raznahan A, Shaw P, Lalonde F, et al. How does your cortex grow? *Journal of Neuroscience*. 2011;31(19):7174-7177.
  34. Van Essen DC. A tension-based theory of morphogenesis and compact wiring in the central nervous system. *Nature*. 1997;385(6614):313.
  35. Rakic P. Specification of cerebral cortical areas. *Science*. 1988;241(4862):170.
  36. Mills KL, Goddings A-L, Herting MM, et al. Structural brain development between childhood and adulthood: Convergence across four longitudinal samples. *NeuroImage*. 2016;141:273-281.
